# Supplementary material for: Elevating H3K27me3 level sensitizes colorectal cancer to oxaliplatin
Source: PubMed Central journal article supplement (PMC7109602; doi:10.1093/jmcb/mjz032), 2019-05-08
Supplement: supplementary_material_mjz032.pdf [file supplementary_material_mjz032.pdf]

## Supplementary Figures

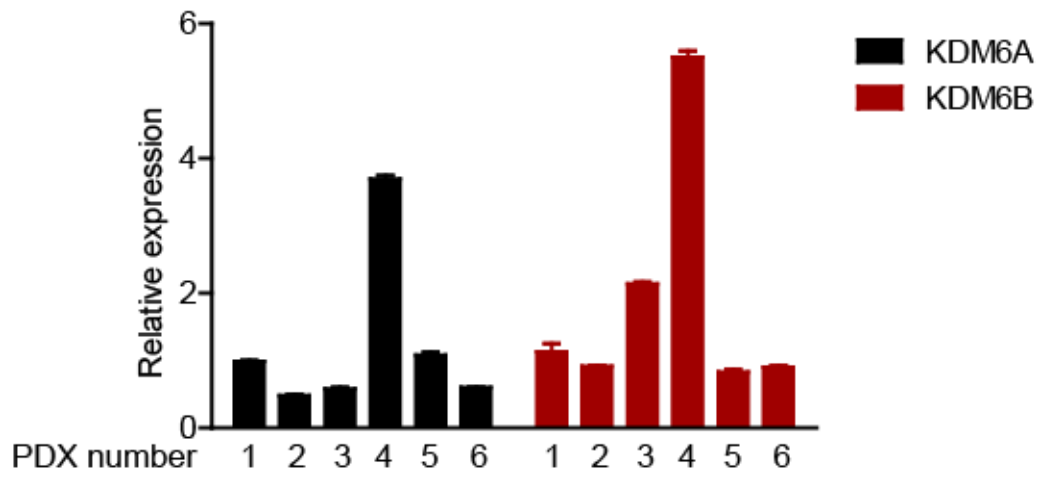

**Supplementary Figure S1.** q-PCR analysis of KDM6A and KDM6B expression in six PDX tumors.

A

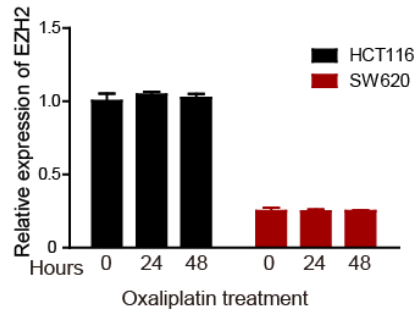

B

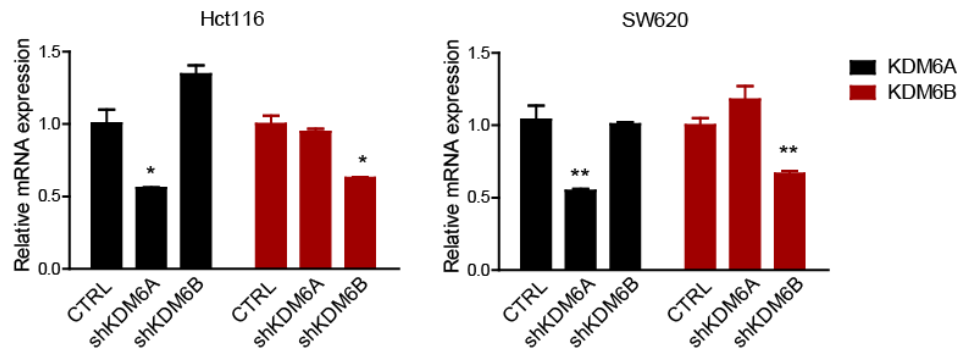

**Supplementary Figure S2.** (A) The EZH2 expression levels in HCT116 cells and SW620 cells treated with oxaliplatin (50  $\mu$ M) for 24 or 48 hours. (B) q-PCR analysis of KDM6A and KDM6B expression in control and KDM6A/KDM6B knockdown cells.

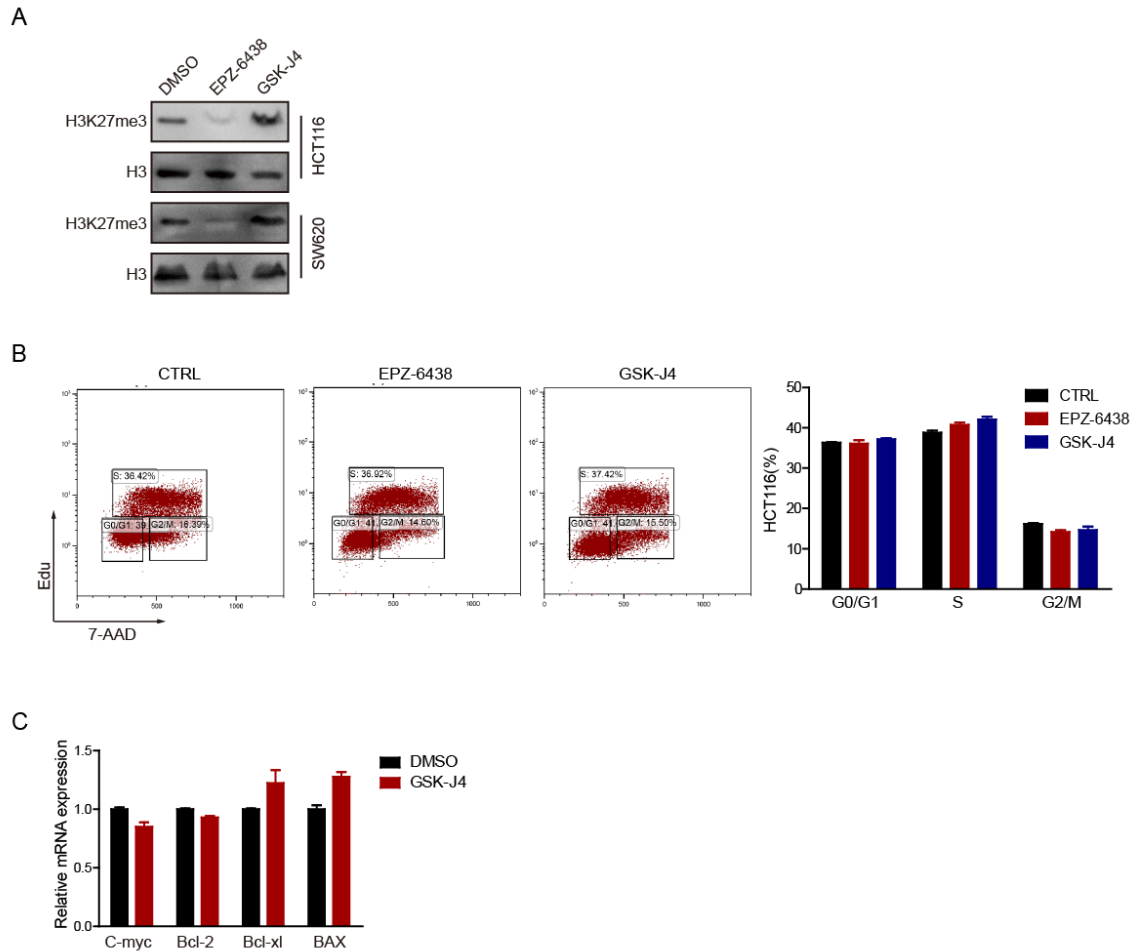

**Supplementary Figure S3.** (A) Immunoblotting analysis of the H3K27me level in HCT116 cells and SW620 cells treated with GSK-J4 (1  $\mu$ M) and EPZ-6438 (10  $\mu$ M) at 48 hours. (B) Flow cytometry was used to evaluate the effects of GSK-J4 or EPZ-6438 treatment on cell-cycle arrest in HCT116. (C) The C-myc, BAX, BCL2, BCL-xl expression levels in HCT116 cells treated with GSK-J4 (1  $\mu$ M) for 48 hours. \* $P < 0.05$  and \*\* $P < 0.01$  compared with control.

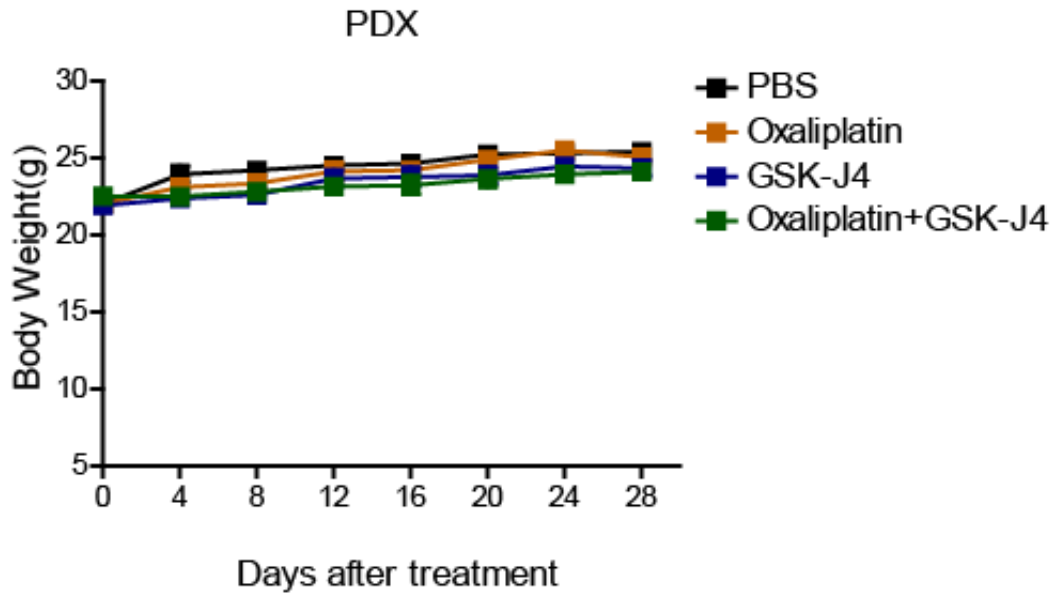

**Supplementary Figure S4.** The body weights of the PDX mice were measured and recorded for each group throughout the experiment (n =6).

Supplementary Tables

| Table S1. Tissue microarray data and clinical information were used for analyses |                    |                   |                              |            |         |              |                             |             |         |         |    |                               |
|----------------------------------------------------------------------------------|--------------------|-------------------|------------------------------|------------|---------|--------------|-----------------------------|-------------|---------|---------|----|-------------------------------|
| N<br>O                                                                           | operati<br>on time | survival<br>state | survival<br>time(mont<br>hs) | gender     | ag<br>e | metast<br>as | pathologi<br>cal<br>grading | Tumor size  | T       | N       | M  | The<br>pathologi<br>cal grade |
| 1                                                                                | 2007.<br>6         | death             | 32                           | fema<br>le | 5<br>2  | no           | II                          | 5×2.5×1cm   | T3      | N1<br>b | M0 | 0                             |
| 2                                                                                | 2007.<br>6         | death             | 7                            | fema<br>le | 8<br>1  | no           | II                          | 4×3×1.5cm   | T4<br>a | N1<br>b | M0 | 0                             |
| 3                                                                                | 2007.<br>6         | survi<br>ve       | 60                           | fema<br>le | 7<br>8  | no           | II                          | 6×5×1.5cm   | T4<br>a | N0      | M0 | 1                             |
| 4                                                                                | 2007.<br>6         | death             | 9                            | fema<br>le | 6<br>4  | no           | II                          | 4×3×1.5cm   | T3      | N0      | M0 | 3                             |
| 5                                                                                | 2007.<br>7         | death             | 76                           | fema<br>le | 5<br>4  | no           | II                          | 5×4×1cm     | T3      | N0      | M0 | 3                             |
| 4                                                                                | 2007.<br>6         | survi<br>ve       | 60                           | fema<br>le | 7<br>4  | no           | III                         | 10×5×1.5cm  | T3      | N2<br>a | M0 | 3                             |
| 5                                                                                | 2007.<br>6         | survi<br>ve       | 60                           | fema<br>le | 8<br>1  | no           | II                          | 4.5×4×1.5cm | T3      | N0      | M0 | 3                             |
| 6                                                                                | 2007.<br>7         | death             | 2                            | fema<br>le | 7<br>9  | no           | II                          | 3.5×3×1cm   | T2      | N0      | M0 | 3                             |
| 7                                                                                | 2007.<br>8         | survi<br>ve       | 60                           | male       | 7<br>4  | no           | III                         | 9×6×1.5cm   | T3      | N2<br>a | M0 | 0                             |
| 8                                                                                | 2007.<br>7         | survi<br>ve       | 60                           | fema<br>le | 6<br>0  | no           | II                          | 3×2×1cm     | T4<br>b | N1<br>a | M0 | 0                             |
| 9                                                                                | 2007.<br>8         | death             | 8                            | fema<br>le | 6<br>0  | no           | II                          | 7×3×1.5cm   | T3      | N1<br>a | M0 | 3                             |
| 10                                                                               | 2007.<br>9         | survi<br>ve       | 60                           | male       | 7<br>9  | no           | III                         | 6×4.5×1cm   | T3      | N1<br>b | M0 | 2                             |
| 11                                                                               | 2007.<br>7         | survi<br>ve       | 60                           | fema<br>le | 5<br>4  | no           | II                          | 5×4×1cm     | T4<br>a | N0      | M0 | 2                             |
| 12                                                                               | 2007.<br>8         | death             | 43                           | fema<br>le | 5<br>0  | no           | II                          | 5×4×1cm     | T3      | N0      | M0 | 2                             |
| 13                                                                               | 2007.<br>7         | death             | 25                           | male       | 7<br>8  | no           | III                         | 4.5×3×1.5cm | T3      | N1<br>b | M0 | 2                             |
| 14                                                                               | 2007.<br>8         | survi<br>ve       | 60                           | fema<br>le | 7<br>0  | no           | II                          | 5×4×1cm     | T3      | N1<br>b | M0 | 2                             |
| 15                                                                               | 2007.<br>9         | death             | 39                           | fema<br>le | 6<br>2  | no           | II                          | 8×7×1cm     | T3      | N0      | M0 | 3                             |
| 16                                                                               | 2007.<br>9         | survi<br>ve       | 60                           | fema<br>le | 6<br>6  | no           | II                          | 6×4.5×1.5cm | T3      | N1<br>a | M0 | 0                             |
| 17                                                                               | 2007-<br>10-18     | death             | 16                           | fema<br>le | 6<br>5  | no           | II                          | 9×3×3cm     | T3      | N1<br>b | M0 | 2                             |
| 18                                                                               | 2007-<br>10-26     | survi<br>ve       | 60                           | fema<br>le | 7<br>0  | no           | II                          | 5×4×1cm     | T3      | N0      | M0 | 2                             |

|    |            |         |    |        |    |    |    |               |     |     |    |   |
|----|------------|---------|----|--------|----|----|----|---------------|-----|-----|----|---|
| 19 | 2007-12-11 | death   | 13 | female | 71 | no | II | 4×3×1cm       | T3  | N1a | M0 | 3 |
| 20 | 2007-12-20 | survive | 60 | female | 78 | no | II | 4×2×0.6cm     | T3  | N0  | M0 | 3 |
| 21 | 2007-12-11 | death   | 12 | female | 61 | no | II | 5×4.5×2cm     | T3  | N0  | M0 | 3 |
| 22 | 2008.3     | survive | 60 | female | 58 | no | II | 6×3×1cm       | T3  | N0  | M0 | 3 |
| 23 | 2007-12-13 | death   | 58 | female | 75 | no | II | 4×4×1cm       | T4a | N0  | M0 | 2 |
| 24 | 2007.9     | survive | 60 | female | 43 | no | II | 5×4.5×1.5cm   | T3  | N2a | M0 | 0 |
| 25 | 2008.1     | death   | 60 | female | 76 | no | II | 6×4.5×1.5cm   | T3  | N0  | M0 | 1 |
| 26 | 2007-12-5  | survive | 60 | female | 61 | no | II | 9×4.5×1.5cm   | T3  | N2b | M0 | 2 |
| 27 | 2008.3     | death   | 18 | female | 72 | no | II | 7×5×2cm       | T4a | N1a | M0 | 2 |
| 28 | 2008.3     | death   | 60 | female | 61 | no | II | 5×4×1.5cm     | T3  | N1b | M0 | 3 |
| 29 | 2008.3     | death   | 36 | female | 64 | no | II | 6×4×1.5cm     | T3  | N0  | M0 | 1 |
| 30 | 2008.3     | death   | 32 | female | 55 | no | II | 3×2.5×1.8cm   | T1  | N0  | M0 | 2 |
| 31 | 2008.4     | death   | 40 | female | 63 | no | II | 4×3.5×2.5cm   | T3  | N0  | M0 | 0 |
| 32 | 2008.3     | death   | 24 | female | 70 | no | II | 3.5×3.5×0.8cm | T3  | N1b | M0 | 1 |
| 33 | 2007.6     | survive | 60 | male   | 62 | no | II | 7×4×1.8cm     | T4a | N0  | M0 | 2 |
| 34 | 2007.9     | survive | 60 | male   | 65 | no | II | 5×4×1cm       | T3  | N1a | M0 | 3 |
| 35 | 2007-10-22 | survive | 60 | male   | 80 | no | II | 2.8×2.5×1cm   | T4b | N0  | M0 | 3 |
| 36 | 2007-11-20 | survive | 60 | male   | 68 | no | II | 3.5×2.7×1cm   | T3  | N0  | M0 | 3 |
| 37 | 2007-12-13 | survive | 60 | male   | 65 | no | II | 10×7×1.5cm    | T4a | N1b | M0 | 2 |
| 38 | 2007-12-17 | survive | 60 | male   | 61 | no | II | 3.3×2.7×1cm   | T2  | N0  | M0 | 3 |
| 39 | 2008.1     | survive | 60 | male   | 68 | no | II | 6×3.5×1.5cm   | T3  | N0  | M0 | 2 |
| 40 | 2008.3     | survive | 60 | male   | 77 | no | II | 5×3.5×1cm     | T3  | N0  | M0 | 3 |

|    |            |         |    |      |    |    |    |                                             |     |     |    |   |
|----|------------|---------|----|------|----|----|----|---------------------------------------------|-----|-----|----|---|
| 41 | 2008.3     | survive | 60 | male | 62 | no | II | 5×4.5×1.5cm                                 | T3  | N1a | M0 | 3 |
| 42 | 2008.3     | survive | 60 | male | 75 | no | II | 5×5×1.5cm                                   | T3  | N2a | M0 | 0 |
| 43 | 2008.3     | survive | 60 | male | 58 | no | II | 3×3×1cm                                     | T3  | N1a | M0 | 3 |
| 44 | 2008.3     | survive | 60 | male | 72 | no | II | 6.5×5×1.5cm                                 | T3  | N0  | M0 | 1 |
| 45 | 2008.3     | survive | 60 | male | 65 | no | II | 6×5×1.5cm                                   | T3  | N0  | M0 | 2 |
| 46 | 2008.3     | survive | 60 | male | 80 | no | II | 2.5×2.5×1cm                                 | T3  | N0  | M0 | 1 |
| 47 | 2007.6     | survive | 60 | male | 72 | no | II | 4×3×1.5cm                                   | T4a | N0  | M0 | 2 |
| 48 | 2008.3     | survive | 60 | male | 71 | no | II | 4.5×3×1.5cm                                 | T3  | N0  | M0 | 2 |
| 49 | 2007.6     | death   | 10 | male | 60 | no | II | 3×2.5×1.5cm                                 | T3  | N0  | M0 | 3 |
| 50 | 2007.7     | death   | 91 | male | 65 | no | II | 4×4×1.5cm                                   | T3  | N0  | M0 | 3 |
| 51 | 2007.7     | death   | 43 | male | 83 | no | II | 6×4.5×1.5cm                                 | T3  | N2b | M0 | 3 |
| 52 | 2007-10-17 | death   | 7  | male | 74 | no | II |                                             | T4b | N2a | M0 | 2 |
| 53 | 2007-10-26 | death   | 5  | male | 75 | no | II | 3×2×1.8cm                                   | T3  | N0  | M0 | 2 |
| 54 | 2007-11-22 | death   | 44 | male | 70 | no | II | 6×3.5×1.5cm                                 | T3  | N1b | M0 | 3 |
| 55 | 2007-12-3  | death   | 58 | male | 58 | no | II | 4×4×1.5cm                                   | T3  | N0  | M0 | 0 |
| 56 | 2008.1     | death   | 16 | male | 74 | no | II | 4×4×1cm                                     | T3  | N1a | M0 | 1 |
| 57 | 2008.3     | death   | 38 | male | 60 | no | II | ①<br>4.5×3.5×1cm<br>;<br>②<br>1.5×0.8×0.8cm | T3  | N0  | M0 | 1 |
| 58 | 2008.4     | death   | 57 | male | 76 | no | II | 2×1.5×1cm                                   | T3  | N1a | M0 | 2 |
| 59 | 2007.9     | death   | 2  | male | 51 | no | II | 3×3×1cm                                     | T3  | N0  | M0 | 2 |
| 60 | 2008.1     | death   | 36 | male | 69 | no | II | 5×5×3cm                                     | T3  | N1b | M0 | 3 |

|        |                |             |    |            |        |    |        |                   |         |         |         |   |
|--------|----------------|-------------|----|------------|--------|----|--------|-------------------|---------|---------|---------|---|
| 6<br>1 | 2008.<br>1     | death       | 51 | male       | 6<br>7 | no | II     | 5×4×3cm           | T4<br>b | N2<br>a | M1<br>a | 3 |
| 6<br>2 | 2008.<br>1     | death       | 4  | male       | 7<br>3 | no | II     | 4×4×2cm           | T4<br>a | N0      | M0      | 3 |
| 6<br>3 | 2007.<br>6     | survi<br>ve | 60 | fema<br>le | 6<br>4 | no | I - II | 5×5×1cm           | T4<br>b | N0      | M0      | 3 |
| 6<br>4 | 2007.<br>7     | survi<br>ve | 60 | fema<br>le | 6<br>0 | no | I - II | 7×6×1.5cm         | T3      | N0      | M0      | 3 |
| 6<br>5 | 2007.<br>8     | survi<br>ve | 60 | fema<br>le | 7<br>6 | no | I - II | 7×6×4cm           | T3      | N0      | M0      | 0 |
| 6<br>6 | 2007-<br>10-18 | survi<br>ve | 60 | fema<br>le | 5<br>0 | no | I - II | 4×3×1cm           | T3      | N0      | M0      | 3 |
| 6<br>7 | 2007.<br>8     | survi<br>ve | 60 | fema<br>le | 7<br>2 | no | I - II | 4.5×4×1.5cm       | T3      | N0      | M0      | 2 |
| 6<br>8 | 2007.<br>6     | death       | 40 | fema<br>le | 6<br>9 | no | I - II | 7×5×1.5cm         | T4<br>a | N0      | M0      | 2 |
| 6<br>9 | 2008.<br>1     | death       | 60 | fema<br>le | 7<br>7 | no | I - II | 6×3×1cm           | T3      | N1<br>a | M0      | 2 |
| 7<br>0 | 2007.<br>9     | death       | 17 | fema<br>le | 6<br>7 | no | I - II | 2.5×2.3×0.6c<br>m | T2      | N0      | M0      | 2 |
| 7<br>1 | 2008.<br>4     | death       | 36 | fema<br>le | 7<br>5 | no | I - II | 5×4×1cm           | T3      | N0      | M0      | 3 |
| 7<br>2 | 2007.<br>6     | survi<br>ve | 60 | male       | 5<br>7 | no | I - II | 5×5×0.5cm         | T3      | N2<br>a | M0      | 1 |
| 7<br>3 | 2007.<br>6     | survi<br>ve | 60 | male       | 7<br>6 | no | I - II | 5×5×3cm           | T3      | N1<br>b | M0      | 2 |
| 7<br>4 | 2007.<br>9     | survi<br>ve | 60 | male       | 5<br>7 | no | I - II | 4.8×3.5×1.5c<br>m | T2      | N0      | M0      | 3 |
| 7<br>5 | 2007-<br>11-26 | survi<br>ve | 60 | male       | 9<br>0 | no | I - II | 6×5×2cm           | T4<br>b | N0      | M0      | 3 |
| 7<br>6 | 2007-<br>12-21 | survi<br>ve | 60 | male       | 6<br>7 | no | I - II | 5×4×1.5cm         | T3      | N0      | M0      | 2 |
| 7<br>7 | 2008.<br>1     | survi<br>ve | 60 | male       | 8<br>5 | no | I - II | 3×2.5×1cm         | T3      | N1<br>a | M0      | 3 |
| 7<br>8 | 2008.<br>2     | survi<br>ve | 60 | male       | 6<br>3 | no | I - II | 3×3×0.8cm         | T3      | N1<br>b | M0      | 2 |
| 7<br>9 | 2008.<br>3     | survi<br>ve | 60 | male       | 7<br>5 | no | I - II | 4.5×3×1cm         | T3      | N0      | M0      | 3 |
| 8<br>0 | 2007-<br>12-7  | survi<br>ve | 60 | male       | 7<br>3 | no | I - II | 6×5×1cm           | T3      | N0      | M0      | 2 |
| 8<br>1 | 2007.<br>6     | death       | 47 | male       | 9<br>1 | no | I - II | 4×4×1.3cm         | T3      | N0      | M0      | 0 |
| 8<br>2 | 2007-<br>12-4  | death       | 31 | male       | 7<br>2 | no | I - II | 9.5×6×2cm         | T2      | N0      | M0      | 1 |



|    |            |         |    |        |    |    |        |                        |     |     |    |   |
|----|------------|---------|----|--------|----|----|--------|------------------------|-----|-----|----|---|
| 83 | 2008.3     | survive | 60 | female | 83 | no | I - II | ①7×5×2cm②<br>5×4×0.5cm |     | N1a | M0 | 2 |
| 84 | 2008.3     | survive | 60 | female | 80 | no | I - II | 4×6×5cm                | T3  | N0  | M0 | 3 |
| 85 | 2007-11-1  | survive | 60 | female | 47 | no | I - II | 9×6×1cm                | T3  | N0  | M0 | 1 |
| 86 | 2008.3     | survive | 60 | female | 86 | no | I - II | 9×6×1.5cm              | T3  | N0  | M0 | 2 |
| 87 | 2008.4     | survive | 60 | female | 75 | no | I - II | 2.5×2×1cm              | T4a | N2a | M0 | 3 |
| 88 | 2007-9-7   | death   | 16 | female | 54 | no | I - II | 5×5×1cm,<br>3×2.5×1cm  | T4a | N1b | M0 | 3 |
| 89 | 2007-11-28 | death   | 11 | female | 73 | no | I - II | 5×5×4cm                | T3  | N0  | M0 | 3 |
| 90 | 2007.7     | death   | 36 | female | 60 | no | I - II | 5×2×1.2cm              | T3  | N0  | M0 | 0 |
| 91 | 2007.7     | survive | 60 | male   | 61 | no | I - II | 6×4.5×1.5cm            | T3  | N1a | M0 | 3 |
| 92 | 2007.9     | survive | 60 | male   | 65 | no | I - II | 7×4×1.5cm              | T3  | N0  | M0 | 2 |
| 93 | 2008.4     | survive | 60 | male   | 65 | no | I - II | 3.5×3×1cm              | T3  | N0  | M0 | 2 |
| 94 | 2008.2     | death   | 22 | male   | 61 | no | I - II | 4×3×3cm                | T3  | N0  | M0 | 1 |
| 95 | 2007.8     | death   | 10 | male   | 51 | no | I - II | 2.5×2×1.5cm            | T4b | N1b | M0 | 1 |

**Supplementary Table S2. Sequences of the Real-time PCR (all for human genes)**

| PT-qPCR Primers        |                            |                          |
|------------------------|----------------------------|--------------------------|
| Gene Name              | Forward                    | Reverse                  |
| <b>KDM6A</b>           | GACATTGAGGGAAGCTCTCA       | ACTTGCATCAGGTCCTCCAT     |
| <b>KDM6B</b>           | TGCTCCGTCAACATCAACAT       | CTTCTGCTCCGTCAACATCA     |
| <b>KDM5C</b>           | GTGGTGGAGGAAGGTGGTTA       | AGCGTAGCAAGGAGCCAATA     |
| <b>CTNNB1</b>          | ATGACTCGAGCTCAGAGGGT       | ATTGCACGTGTGGCAAGTTC     |
| <b>NOTCH1</b>          | GCAGTTGTGCTCCTGAAGAA       | CGGGCGGCCAGAAAC          |
| <b>NOTCH2</b>          | GGCATTAAATCGCTACAGTTGTGTCT | GGAGGCACACTCATCAATGTCA   |
| <b>HES7</b>            | ACGGCCCCAAGATGCTCAA        | TTTCTCCAGCTTCGGGTTC      |
| <b>JAG1</b>            | GGAGGCGTGGGATTCCA          | CCGAGTGAGAAGCCTTTCAATAAT |
| <b>CD133</b>           | ACAATTCACCAGCAACGAGTCC     | GACGCTTTGGTATAGAGTGCTCAG |
| <b>LGR5</b>            | CTCCAGGTCTGGTGTGTTG        | GTGAAGACGCTGAGGTTGGA     |
| <b>SOX2</b>            | GTATCAGGAGTTGTCAAGGC       | AGTCCTAGTCTTAAAGAGG      |
| <b>NANOG</b>           | TAGCAATGGTGTGACGCAGAAG     | TCTGGTTGCTCCACATTGGAAGG  |
| <b>CHIP- NOTCH2-P1</b> | AGATACAGGGACAGAAACA        | GGAAATCCTACCCATAGA       |
| <b>CHIP- NOTCH2-P2</b> | TCCGTCCCTTGACTCCTCT        | AACCTGGGTACAAGTGGG       |
| <b>CHIP- NOTCH2-P3</b> | TCCATTCCCTCTAAGGGTG        | CCAAGACTTTGCCGCTGT       |
| <b>CHIP- NOTCH2-P4</b> | CCACTCCGTGATGGCTCTA        | CCGGGATCGTGAACCTGC       |
| <b>CHIP- NOTCH2-P5</b> | GGGAGTCGAGGCATTTGCG        | CCCTCAGCCCGATACTCACCAT   |
| <b>CHIP- NOTCH2-P6</b> | GTTCCCAAGAGTTTGGACATCG     | ATCTGGCATTCTTCGCTCA      |
| <b>CHIP- NOTCH2-P7</b> | GTCCAGACCCAGGAATGT         | CTCCAAAGCCCAAGTTAT       |
| <b>CHIP- NOTCH2-P8</b> | CCAGTGGGATGCTGTCTT         | TCGGGTGATAAATAACCTTG     |

**Supplementary Table S3. shRNA Sequences Targeting KDM6A/KDM6B**

|                |                  |                                                                        |
|----------------|------------------|------------------------------------------------------------------------|
| <b>shKDM6A</b> | Top<br>strend    | gatccGCTGTTTCGCTGCTATGAATTTCAAGAGAATT<br>CATAGCAGCGAACAGCTTTTTTACGCGTg |
|                | Botton<br>strend | aattcACGCGTAAAAAAGCTGTTTCGCTGCTATGAAT<br>TCTCTTGAAATTCATAGCAGCGAACAGCg |
| <b>shKDM6B</b> | Top<br>strend    | gatccGATGATCTCTATGCATCCATTCAAGAGATG<br>GATGCATAGAGATCATCTTTTTTg        |
|                | Botton<br>strend | aattcAAAAAAGATGATCTCTATGCATCCATCTCTT<br>GAATGGATGCATAGAGATCATCg        |

Annealed top and bottom strands were inserted into pLVX-shRNA1 plasmid. *EcoRI* and *BamHI* were used as **restriction enzymes**.
